# Supplementary material
Source: PubMed Central journal article supplement (PMC3178402)
Supplement: hdy20111x1.pdf [file hdy20111x1.pdf]

## Supplementary Material

Figure S1. Measurement of the extent of barring using the grey value CV. Each panel (**a-d**) represents a single fish. A cropped portion of the midline, encompassing 10 body segments (myomeres), is shown underneath a plot of the average grey value for each pixel column across the image (solid line). A dashed line represents the best-fit straight line that was used for calculating the grey value CV, as described in the Methods. The resulting CV value is reported above each panel. Panels (**a,b**) represent barred fish and panels (**c,d**) represent unbarred fish.

Figure S1

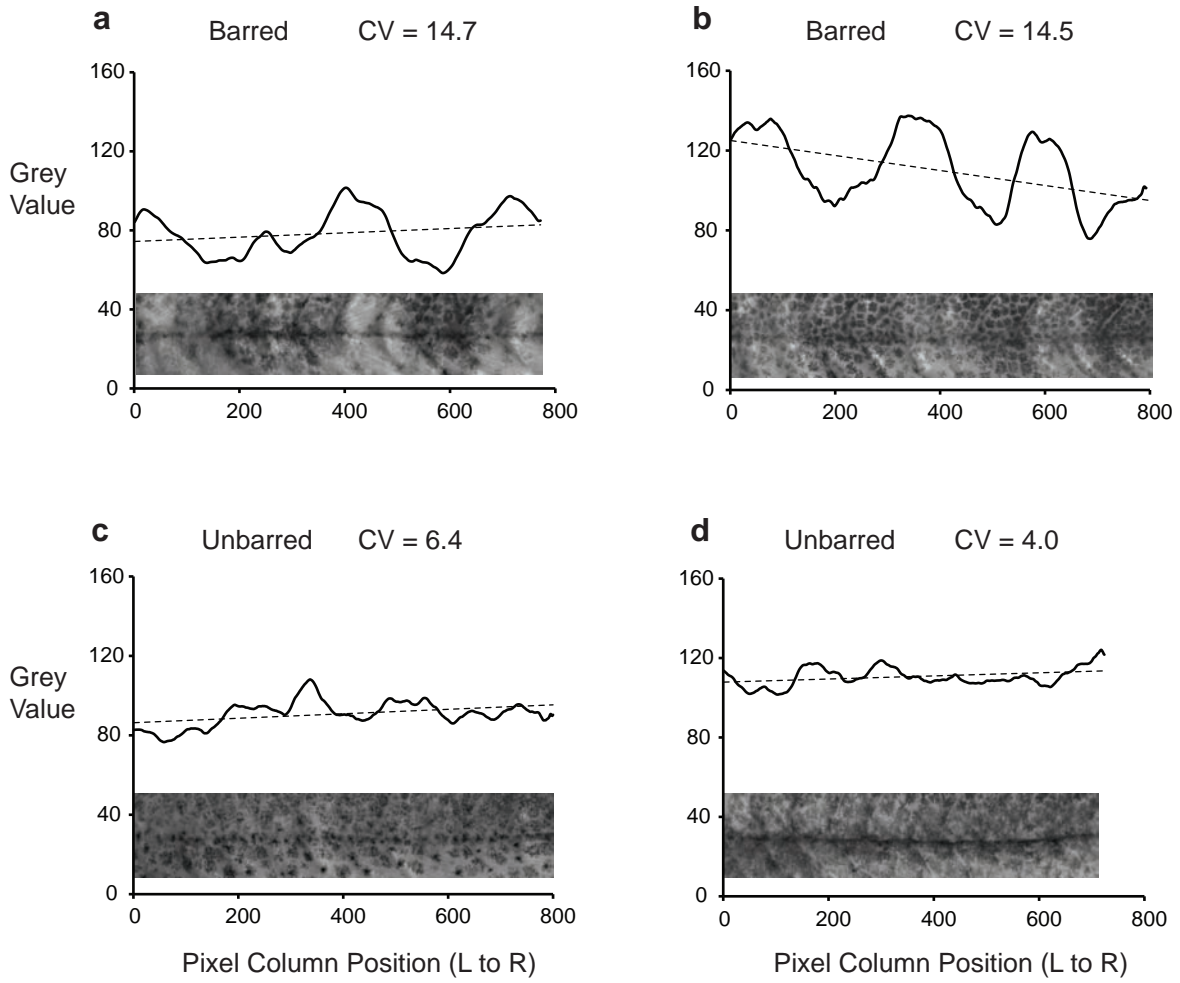

Figure S2. Persistence of barred pattern underneath iridophores in an older Hotel Lake fish. **(a)** shows a photograph of the flank of a live 32-mm Hotel Lake fish; **(b)** shows a photograph of the same fish following immersion in formalin to dissolve iridophores.

Scale bar is 2 mm.

Figure S2

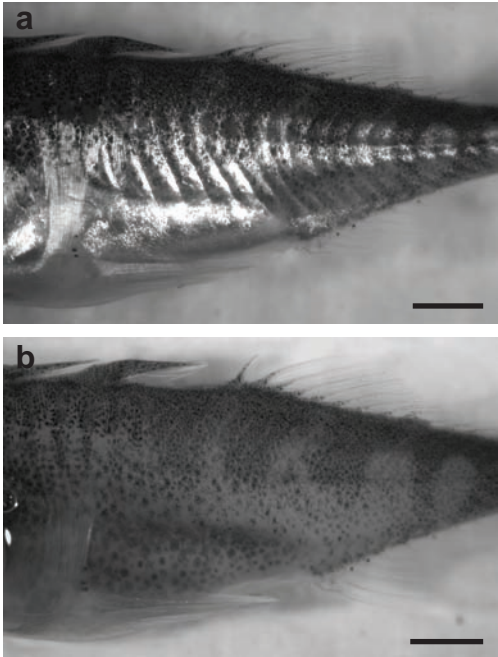

Table S1.  
SNP markers used for linkage mapping.

| <i>LG</i> | <i>Map position<br/>(cM)</i> | <i>Marker name<br/>(chromosome: position)</i> | <i>NCBI assay ID (ss#)</i> |
|-----------|------------------------------|-----------------------------------------------|----------------------------|
| 1         | 0                            | chrI:675926                                   | 244222765                  |
| 1         | 0.254                        | chrUn:37631434                                | 244223001                  |
| 1         | 1.145                        | chrI:881806                                   | 244222766                  |
| 1         | 11.151                       | chrI:1549902                                  | 244222767                  |
| 1         | 30.837                       | chrI:3310077                                  | 244222768                  |
| 1         | 36.768                       | chrI:4219350                                  | 244222770                  |
| 1         | 38.132                       | chrI:4816374                                  | 244222771                  |
| 1         | 40.471                       | chrI:7820850                                  | 244222772                  |
| 1         | 40.593                       | chrI:8072483                                  | 244222773                  |
| 1         | 43.594                       | chrI:11963492                                 | 120258415                  |
| 1         | 62.21                        | chrI:23569502                                 | 244222776                  |
| 1         | 65.909                       | chrI:22361077                                 | 120258417                  |
| 1         | 66.857                       | chrI:21762138                                 | 244223024                  |
| 1         | 67.028                       | chrI:21909727                                 | 244223036                  |
| 1         | 67.264                       | chrI:21663978                                 | 244222774                  |
| 1         | 68.298                       | chrI:21641897                                 | 244223012                  |
| 1         | 90.938                       | chrI:27721035                                 | 244222778                  |
| 2         | 0.366                        | chrII:919438                                  | 244222781                  |
| 2         | 1.006                        | chrUn:23753128                                | 244222989                  |
| 2         | 2.102                        | chrII:418094                                  | 244222780                  |
| 2         | 2.171                        | chrII:411522                                  | 244223041                  |
| 2         | 2.187                        | chrII:409087                                  | 244223040                  |
| 2         | 2.187                        | chrII:377479                                  | 244222779                  |
| 2         | 9.363                        | chrII:3384330                                 | 120258421                  |
| 2         | 14.398                       | chrII:4530808                                 | 120258423                  |
| 2         | 22.505                       | chrII:6475468                                 | 244222782                  |
| 2         | 26.071                       | chrII:12292176                                | 120258425                  |
| 2         | 27.637                       | chrII:13353603                                | 244222783                  |
| 2         | 28.246                       | chrII:14611516                                | 244222784                  |
| 2         | 45.933                       | chrII:19985741                                | 244222785                  |
| 2         | 61.075                       | chrII:21231538                                | 244222786                  |
| 2         | 66.734                       | chrII:22443700                                | 244222787                  |
| 3         | 0                            | chrIII:706165                                 | 244222789                  |
| 3         | 22.626                       | chrIII:10376395                               | 244222790                  |
| 3         | 30.32                        | chrIII:13582181                               | 244222791                  |
| 3         | 31.555                       | chrIII:13929118                               | 244222792                  |
| 3         | 33.955                       | chrIII:14307973                               | 244222793                  |
| 3         | 51.6                         | chrIII:15933767                               | 244222795                  |
| 3         | 57.676                       | chrIII:16463929                               | 244222796                  |
| 4         | 0                            | chrIV:1541964                                 | 244222797                  |
| 4         | 4.091                        | chrIV:1942641                                 | 244222798                  |

|   |        |                |           |
|---|--------|----------------|-----------|
| 4 | 40.561 | chrIV:8579158  | 244223069 |
| 4 | 40.592 | chrIV:8576794  | 244223068 |
| 4 | 41.361 | chrIV:10812344 | 244223042 |
| 4 | 42.149 | chrIV:12810099 | 244223044 |
| 4 | 42.496 | chrIV:12815271 | 244223046 |
| 4 | 42.501 | chrIV:12817401 | 244223048 |
| 4 | 43.367 | chrIV:13850026 | 244223049 |
| 4 | 43.659 | chrIV:13920409 | 244223053 |
| 4 | 44.849 | chrIV:15052901 | 244222804 |
| 4 | 45.709 | chrIV:15721538 | 244222806 |
| 4 | 48.118 | chrIV:26193487 | 244222808 |
| 4 | 49.309 | chrIV:23968803 | 244223066 |
| 4 | 50.253 | chrIV:19906553 | 244223064 |
| 4 | 76.196 | chrIV:31740478 | 244222809 |
| 4 | 80.243 | chrIV:32033500 | 244222810 |
| 4 | 82.324 | chrIV:32133665 | 244222811 |
| 4 | 84.904 | chrIV:32387818 | 120258447 |
| 4 | 96.33  | chrUn:27478064 | 244222993 |
| 4 | 96.952 | chrUn:32765800 | 244222999 |
| 5 | 0      | chrUn:11621796 | 244222985 |
| 5 | 0.582  | chrUn:12390868 | 120258569 |
| 5 | 16.367 | chrV:2528528   | 244222814 |
| 5 | 16.452 | chrV:2489835   | 244223075 |
| 5 | 16.462 | chrV:2489551   | 244223074 |
| 5 | 18.7   | chrV:4852958   | 244222815 |
| 5 | 26.53  | chrV:9157076   | 244222818 |
| 5 | 27.1   | chrV:8327818   | 244222816 |
| 5 | 28.233 | chrV:8562218   | 244222817 |
| 5 | 49.154 | chrV:11289138  | 244222819 |
| 5 | 53.305 | chrUn:25946639 | 244222990 |
| 6 | 0      | chrVI:657036   | 244222822 |
| 6 | 1.276  | chrVI:388112   | 244222821 |
| 6 | 2.882  | chrVI:218630   | 244222820 |
| 6 | 5.492  | chrVI:3116218  | 244222825 |
| 6 | 13.981 | chrVI:1440771  | 244222823 |
| 6 | 20.454 | chrVI:5777528  | 244222826 |
| 6 | 25.077 | chrVI:8169471  | 244222827 |
| 6 | 46.876 | chrVI:15041940 | 244222829 |
| 6 | 48.354 | chrVI:15274689 | 244222830 |
| 6 | 48.942 | chrVI:15390272 | 244222831 |
| 6 | 51.003 | chrVI:15586470 | 244222832 |
| 6 | 52.499 | chrVI:15780594 | 244222833 |
| 6 | 60.095 | chrVI:16870159 | 244222834 |
| 7 | 0      | chrUn:28671327 | 244222995 |
| 7 | 18.762 | chrVII:1728753 | 244222835 |
| 7 | 38.988 | chrVII:5936068 | 120258457 |

|    |        |                  |           |
|----|--------|------------------|-----------|
| 7  | 43.982 | chrVII:13452516  | 244222836 |
| 7  | 45.113 | chrVII:17369940  | 244222838 |
| 7  | 45.404 | chrVII:18353106  | 244222839 |
| 7  | 56.728 | chrVII:24331980  | 244222840 |
| 7  | 63.125 | chrVII:25257754  | 244222841 |
| 7  | 68.716 | chrVII:25662266  | 120258460 |
| 7  | 79.262 | chrVII:26538823  | 244222842 |
| 8  | 0      | chrVIII:1929053  | 244222843 |
| 8  | 11.671 | chrVIII:3627706  | 244222844 |
| 8  | 13.598 | chrVIII:4503012  | 244222845 |
| 8  | 24.462 | chrVIII:13412707 | 244222846 |
| 8  | 24.468 | chrVIII:13613729 | 244222847 |
| 8  | 26.525 | chrVIII:14472465 | 244222848 |
| 8  | 32.814 | chrVIII:15993592 | 244222849 |
| 8  | 33.384 | chrVIII:16148618 | 244222850 |
| 8  | 34.041 | chrVIII:16262675 | 244222851 |
| 8  | 40.352 | chrVIII:16826029 | 244222852 |
| 8  | 42.147 | chrVIII:16954373 | 244222853 |
| 8  | 45.009 | chrVIII:17576018 | 120258466 |
| 8  | 48.536 | chrVIII:18047605 | 244222854 |
| 8  | 51.791 | chrVIII:18760705 | 244222855 |
| 9  | 0      | chrIX:639609     | 244222856 |
| 9  | 10.89  | chrIX:2089567    | 244222858 |
| 9  | 11.803 | chrIX:2360337    | 244222859 |
| 9  | 16.336 | chrIX:16779825   | 244222869 |
| 9  | 18.039 | chrIX:15670033   | 244222868 |
| 9  | 21.785 | chrIX:13061535   | 244222867 |
| 9  | 22.149 | chrIX:12933483   | 244222865 |
| 9  | 22.152 | chrIX:12982163   | 244222866 |
| 9  | 24.933 | chrIX:10468143   | 244222864 |
| 9  | 26.205 | chrIX:8852807    | 244223071 |
| 9  | 26.206 | chrIX:8586014    | 244223070 |
| 9  | 26.206 | chrIX:8719760    | 120258475 |
| 9  | 39.316 | chrIX:5568375    | 244222863 |
| 9  | 40.51  | chrIX:5441237    | 244222862 |
| 9  | 40.51  | chrIX:5403530    | 120258474 |
| 9  | 41.123 | chrIX:5329484    | 244222861 |
| 9  | 41.434 | chrIX:5109672    | 244222860 |
| 10 | 0      | chrX:3182187     | 244222872 |
| 10 | 12.041 | chrX:8647016     | 244222873 |
| 10 | 16.388 | chrX:11252137    | 244222875 |
| 10 | 16.431 | chrX:11317926    | 244222876 |
| 10 | 42.913 | chrX:14265366    | 120258486 |
| 10 | 44.447 | chrUn:39760177   | 244223002 |
| 11 | 0      | chrXI:457909     | 244222878 |
| 11 | 0.302  | chrXI:1449684    | 120258489 |

|    |        |                  |           |
|----|--------|------------------|-----------|
| 11 | 0.905  | chrXI:965263     | 244222879 |
| 11 | 3.636  | chrXI:3120961    | 244222880 |
| 11 | 7.552  | chrXI:5652622    | 244223078 |
| 11 | 8.205  | chrXI:5752298    | 244223080 |
| 11 | 8.432  | chrXI:5472842    | 244223076 |
| 11 | 8.457  | chrXI:5845597    | 244223081 |
| 11 | 8.457  | chrXI:5653380    | 244223079 |
| 11 | 8.457  | chrXI:5652180    | 244223077 |
| 11 | 8.46   | chrXI:5708414    | 244222881 |
| 11 | 13.588 | chrXI:10442904   | 244222882 |
| 11 | 15.416 | chrXI:10976029   | 244222883 |
| 11 | 37.151 | chrXI:14830913   | 244222885 |
| 11 | 40.05  | chrXI:15005173   | 244222886 |
| 11 | 49.388 | chrXI:15600885   | 244222887 |
| 11 | 61.335 | chrXI:16701186   | 244222888 |
| 12 | 0      | chrXII:1589655   | 120258497 |
| 12 | 1.386  | chrXII:1483544   | 244222889 |
| 12 | 7.44   | chrXII:14223760  | 244222895 |
| 12 | 7.44   | chrXII:14346080  | 244223084 |
| 12 | 7.441  | chrXII:14353450  | 244222896 |
| 12 | 8.286  | chrXII:13151755  | 244223082 |
| 12 | 8.286  | chrXII:13045611  | 244222894 |
| 12 | 8.287  | chrXII:13151981  | 244223083 |
| 12 | 8.289  | chrXII:13004645  | 244222893 |
| 12 | 15.543 | chrXII:6745006   | 244222892 |
| 12 | 29.345 | chrXII:4042442   | 244222891 |
| 12 | 30.22  | chrXII:3894122   | 244222890 |
| 12 | 35.799 | chrXII:18221941  | 244222899 |
| 12 | 36.679 | chrXII:18196420  | 244222898 |
| 12 | 39.434 | chrXII:17758877  | 244222897 |
| 12 | 40.062 | chrUn:31913084   | 244222986 |
| 13 | 0      | chrXIII:1001571  | 120258503 |
| 13 | 3.018  | chrXIII:1909687  | 244222900 |
| 13 | 6.71   | chrXIII:2523163  | 120258505 |
| 13 | 7.581  | chrXIII:2632698  | 244222901 |
| 13 | 8.784  | chrXIII:2822352  | 244222902 |
| 13 | 31.96  | chrXIII:15462116 | 244222903 |
| 13 | 38.088 | chrXIII:17052511 | 244222904 |
| 13 | 45.28  | chrXIII:18043261 | 244222905 |
| 13 | 62.569 | chrXIII:19824333 | 244222906 |
| 13 | 88.166 | chrUn:55480965   | 244223073 |
| 14 | 0      | chrUn:36334731   | 244223000 |
| 14 | 14.619 | chrXIV:1383447   | 244222908 |
| 14 | 17.911 | chrXIV:1713227   | 120258513 |
| 14 | 25.205 | chrXIV:2345947   | 244222909 |
| 14 | 55.04  | chrUn:21213332   | 120258571 |



|    |        |                  |           |
|----|--------|------------------|-----------|
| 15 | 1.574  | chrXV:1029767    | 244223088 |
| 15 | 11.935 | chrXV:1902350    | 244222911 |
| 15 | 14.617 | chrXV:2169610    | 244222912 |
| 15 | 17.975 | chrXV:2377782    | 244222913 |
| 15 | 18.302 | chrXV:2507809    | 244222914 |
| 15 | 27.216 | chrXV:3568577    | 244222915 |
| 15 | 33.275 | chrXV:5929959    | 244222916 |
| 15 | 35.182 | chrXV:7200442    | 244223089 |
| 15 | 51.176 | chrXV:16003465   | 244222919 |
| 15 | 54.495 | chrXV:15139567   | 244222918 |
| 15 | 57.629 | chrXV:14693722   | 244222917 |
| 15 | 57.837 | chrXV:16193822   | 244222920 |
| 16 | 0      | chrXVI:2392758   | 244222921 |
| 16 | 2.324  | chrXVI:2650854   | 244222922 |
| 16 | 8.335  | chrXVI:11849396  | 244223090 |
| 16 | 9.708  | chrXVI:3206769   | 244222923 |
| 16 | 15.486 | chrXVI:5562355   | 244222924 |
| 16 | 15.973 | chrXVI:6451650   | 244222925 |
| 16 | 20.744 | chrXVI:9428786   | 244222926 |
| 16 | 21.61  | chrXVI:9857539   | 244222927 |
| 16 | 21.61  | chrXVI:9981125   | 244222928 |
| 16 | 22.429 | chrXVI:12111717  | 120258526 |
| 16 | 24.102 | chrXVI:12996432  | 244222929 |
| 16 | 25.319 | chrXVI:13588796  | 244222930 |
| 16 | 25.635 | chrXVI:14093156  | 244222931 |
| 16 | 25.944 | chrXVI:14283264  | 244222932 |
| 16 | 28.055 | chrXVI:14963879  | 244222933 |
| 16 | 30.961 | chrXVI:15457430  | 244222934 |
| 16 | 31.055 | chrXVI:15826700  | 244222935 |
| 16 | 35.447 | chrXVI:17895677  | 244222938 |
| 16 | 36.632 | chrXVI:17773420  | 244222937 |
| 16 | 41.949 | chrXVI:17347559  | 244223091 |
| 16 | 42.85  | chrXVI:17236926  | 244222936 |
| 16 | 51.401 | chrUn:26389255   | 244222992 |
| 17 | 0      | chrUn:56537801   | 244223003 |
| 17 | 3.618  | chrXVII:769372   | 244222939 |
| 17 | 18.733 | chrXVII:2664810  | 244222940 |
| 17 | 20.617 | chrXVII:3094026  | 244222941 |
| 17 | 27.542 | chrXVII:3906379  | 244222942 |
| 17 | 29.946 | chrXVII:4846889  | 244222943 |
| 17 | 30.222 | chrXVII:4909843  | 244222944 |
| 17 | 34.203 | chrUn:498491     | 244222983 |
| 17 | 35.291 | chrXVII:8770036  | 244222945 |
| 17 | 35.591 | chrXVII:9024413  | 244222946 |
| 17 | 37.109 | chrXVII:9697366  | 244222947 |
| 17 | 39.234 | chrXVII:10176745 | 244222948 |

|    |        |                   |           |
|----|--------|-------------------|-----------|
| 17 | 41.325 | chrXVII:10925100  | 244222949 |
| 18 | 0      | chrXVIII:2251951  | 244222950 |
| 18 | 9.996  | chrXVIII:5765162  | 120258540 |
| 18 | 17.782 | chrXVIII:9955470  | 244222951 |
| 18 | 20.125 | chrXVIII:11086837 | 120258542 |
| 18 | 20.418 | chrXVIII:11402209 | 244222952 |
| 18 | 20.69  | chrXVIII:11641450 | 244222953 |
| 18 | 21.961 | chrXVIII:12146976 | 244222955 |
| 18 | 22.603 | chrXVIII:13352631 | 120258546 |
| 18 | 22.615 | chrXVIII:12501504 | 244222956 |
| 18 | 22.62  | chrXVIII:12818939 | 120258545 |
| 18 | 22.697 | chrXVIII:13193140 | 244222957 |
| 18 | 23.111 | chrXVIII:11896010 | 244222954 |
| 18 | 29.645 | chrXVIII:14076408 | 244222959 |
| 19 | 0      | chrXIX:910003     | 244222960 |
| 19 | 17.254 | chrXIX:2467932    | 244235759 |
| 19 | 18.201 | chrXIX:2464070    | 244235760 |
| 19 | 18.211 | chrXIX:2477173    | 244235761 |
| 19 | 18.213 | chrXIX:2459466    | 244235762 |
| 19 | 18.374 | chrXIX:2526286    | 244223087 |
| 19 | 27.369 | chrXIX:14798132   | 244223086 |
| 19 | 27.369 | chrXIX:14796728   | 244223085 |
| 19 | 27.963 | chrXIX:13466609   | 244222961 |
| 19 | 33.886 | chrXIX:7129928    | 244235763 |
| 20 | 0      | chrXX:232763      | 244223092 |
| 20 | 9.17   | chrXX:17770802    | 244222971 |
| 20 | 9.786  | chrXX:17708486    | 244222970 |
| 20 | 28.102 | chrXX:16137862    | 244222969 |
| 20 | 34.293 | chrXX:14462157    | 244222968 |
| 20 | 36.101 | chrXX:12681526    | 244222967 |
| 20 | 36.101 | chrXX:12622695    | 244222966 |
| 20 | 37.508 | chrXX:9279241     | 244222965 |
| 20 | 37.766 | chrXX:8905625     | 244222963 |
| 20 | 37.801 | chrXX:8918466     | 244222964 |
| 20 | 47.348 | chrXX:3608355     | 244223093 |
| 20 | 58.211 | chrXX:1758783     | 244222962 |
| 20 | 61.45  | chrXX:19020370    | 244222972 |
| 21 | 0      | chrUn:5488093     | 244222984 |
| 21 | 1.772  | chrUn:6720054     | 244222987 |
| 21 | 2.125  | chrUn:6889743     | 244222988 |
| 21 | 8.063  | chrXXI:7544041    | 244222978 |
| 21 | 8.353  | chrXXI:5791519    | 244222974 |
| 21 | 8.479  | chrXXI:5737465    | 244222973 |
| 21 | 8.653  | chrXXI:6037992    | 244222976 |
| 21 | 8.653  | chrXXI:5793103    | 244222975 |
| 21 | 8.657  | chrXXI:7002178    | 244222977 |

|    |        |                 |           |
|----|--------|-----------------|-----------|
| 21 | 22.381 | chrXXI:10236129 | 244222980 |
| 21 | 29.974 | chrXXI:10969152 | 244222981 |
| 21 | 31.076 | chrXXI:11060209 | 120258566 |
| 21 | 34.162 | chrXXI:11179443 | 244222982 |
| 21 | 52.397 | chrXXI:11414383 | 120258567 |
| 21 | 52.689 | chrUn:28234702  | 244222994 |
| 21 | 52.689 | chrUn:28091692  | 244223072 |
| 21 | 54.145 | chrUn:31339987  | 244222998 |

Marker name and associated NCBI assay ID (ss#) are shown by linkage group (LG). The position of each marker on the linkage group is shown in centimorgans (cM). The marker name indicates the chromosomal position of the SNP marker in the initial stickleback genome assembly (Broad S1, Feb 2006). Positions on unassembled portions of the genome are listed in reference to the composite “ChrUn” found on the UCSC genome browser. The NCBI assay ID can be used to retrieve SNP marker information at: <http://www.ncbi.nlm.nih.gov/projects/SNP/>.

Table S2.

List of pigmentation candidate genes, their positions in the stickleback genome, and their functions in pigmentation.

| Gene                             | Gene name                                                          | Chr                                      | Ensembl predicted gene                                     | Function                                                                              | References                                                           |
|----------------------------------|--------------------------------------------------------------------|------------------------------------------|------------------------------------------------------------|---------------------------------------------------------------------------------------|----------------------------------------------------------------------|
| <i>Asip</i>                      | Agouti signaling protein                                           | ChrXVII: 1.1<br>ChrXXI: 1.9              | Not available<br>Not available                             | Melanin synthesis; Mc1r antagonist                                                    | (Cerde-Reverter <i>et al.</i> , 2005; Hoekstra, 2006)                |
| <i>Ap3d1</i>                     | Adaptor-related protein complex 3, delta 1 subunit                 | ChrVIII: 14.4                            | ENSGACG00000011421                                         | Melanosome biogenesis; Mouse <i>Mocha</i> mutant                                      | (Navarro <i>et al.</i> , 2008)                                       |
| <i>Ap3s1</i>                     | Adaptor-related protein complex 3, sigma 1 subunit                 | ChrXIII: 4.6                             | ENSGACG00000006172                                         | Melanosome biogenesis                                                                 | (Navarro <i>et al.</i> , 2008)                                       |
| <i>Atp6ap2</i>                   | ATPase, H <sup>+</sup> transporting, lysosomal accessory protein 2 | ChrXVI: 2.3                              | ENSGACG00000001684                                         | Melanosome biogenesis                                                                 | (Navarro <i>et al.</i> , 2008)                                       |
| <i>Bnc2</i>                      | Basonuclin-2                                                       | ChrIX: 7.8                               | ENSGACG00000017398                                         | Chromatophore development; Zebrafish <i>bonaparte</i> mutant                          | (Lang <i>et al.</i> , 2009)                                          |
| <i>Bloc1s1</i>                   | Biogenesis of lysosome related organelle complex-1 subunit 1       | ChrXVII: 4.1                             | ENSGACG00000005870                                         | Melanosome biogenesis                                                                 | (Navarro <i>et al.</i> , 2008)                                       |
| <i>Bloc1s3</i>                   | Biogenesis of lysosome related organelle complex-1 subunit 3       | ChrI: 7.1                                | ENSGACG00000008332                                         | Melanosome biogenesis; Mouse <i>Reduced pigmentation</i> mutant                       | (Navarro <i>et al.</i> , 2008; Starcevic and Dell'Angelica, 2004)    |
| <i>Cxcl12</i><br>( <i>Sdf1</i> ) | Chemokine (C-X-C motif) ligand 12 (stromal cell-derived factor 1)  | ChrVI: 8.1<br>ChrIX: 14.2                | ENSGACG00000006921<br>ENSGACG00000018739                   | Melanophore development and patterning; Zebrafish <i>choker</i> mutant                | (Svetic <i>et al.</i> , 2007)                                        |
| <i>Cno</i>                       | Cappuccino                                                         | ChrX: 5.5                                | ENSGACG00000003558                                         | Melanosome biogenesis; Mouse <i>Cappuccino</i> mutant                                 | (Navarro <i>et al.</i> , 2008)                                       |
| <i>Csflr</i><br>( <i>Fms</i> )   | Colony-stimulating factor-1 receptor                               | ChrIV: 10.9<br>ChrVII: 27.9              | ENSGACG00000018007<br>ENSGACG00000020913                   | Xanthophore development and chromatophore patterning; Zebrafish <i>panther</i> mutant | (Parichy <i>et al.</i> , 2000b)                                      |
| <i>Dct</i><br>( <i>Tyrp2</i> )   | Dopachrome tautomerase                                             | ChrXVI: 9.2                              | ENSGACG00000004101                                         | Melanin synthesis                                                                     | (Braasch <i>et al.</i> , 2007)                                       |
| <i>Dhpr</i>                      | Dihydropteridine reductase                                         | ChrIV: 2.7                               | ENSGACG00000016641                                         | Pteridine synthesis                                                                   | (Braasch <i>et al.</i> , 2007)                                       |
| <i>Ednrb1</i>                    | Endothelin receptor B                                              | ChrIII: 0.4<br>ChrXVI: 9.0               | ENSGACG00000012901<br>ENSGACG00000004048                   | Melanophore development; Zebrafish <i>rose</i> mutant                                 | (Parichy <i>et al.</i> , 2000a)                                      |
| <i>ErbB3</i>                     | EGF-like receptor tyrosine kinase                                  | ChrXII: 11.3<br>ChrUn: 2.0               | ENSGACG00000009144<br>ENSGACG00000000747                   | Chromatophore development; Zebrafish <i>picasso</i> mutant                            | (Budi <i>et al.</i> , 2008)                                          |
| <i>Fbxw4</i>                     | F-box/WD repeat-containing protein 4                               | ChrVI: 3.8                               | ENSGACG00000003785                                         | Chromatophore patterning; Zebrafish <i>hagoromo</i> mutant                            | (Kawakami <i>et al.</i> , 2000)                                      |
| <i>Foxd3</i>                     | Forkhead box protein D3                                            | ChrVII: 7.7                              | ENSGACG00000006933                                         | Melanophore and iridophore development; Zebrafish <i>mother superior</i> mutant       | (Curran <i>et al.</i> , 2009; Montero-Balaguer <i>et al.</i> , 2006) |
| <i>Gch1</i>                      | GTP cyclohydrolase 1                                               | ChrII: 21.8<br>ChrV: 1.8<br>ChrVIII: 9.4 | ENSGACG00000017325<br>ENSGACG000000002770<br>Not available | Pteridine synthesis                                                                   | (Braasch <i>et al.</i> , 2007)                                       |
| <i>Gchfr</i>                     | GTP cyclohydrolase I feedback regulator                            | ChrXV: 2.6                               | ENSGACG00000006183                                         | Pteridine synthesis                                                                   | (Braasch <i>et al.</i> , 2007)                                       |
| <i>Gnal1</i>                     | Guanine nucleotide binding protein, alpha 11                       | ChrVIII: 14.5<br>ChrXV: 8.0              | ENSGACG00000011473<br>ENSGACG00000009827                   | Melanocyte development; Mouse <i>dark skinned 7</i>                                   | (Kelsh <i>et al.</i> , 2009)                                         |

|                                    |                                                                                                       |                                            |                                                                |                                                                                                        |                                                                |
|------------------------------------|-------------------------------------------------------------------------------------------------------|--------------------------------------------|----------------------------------------------------------------|--------------------------------------------------------------------------------------------------------|----------------------------------------------------------------|
| <i>Gnaq</i>                        | Guanine nucleotide binding protein, q polypeptide                                                     | ChrVII: 0.2<br>ChrXIII: 7.9<br>ChrXIV: 3.3 | ENSGACG00000018567<br>ENSGACG00000007821<br>ENSGACG00000016186 | Melanocyte development;<br>Mouse <i>dark skinned 1/10</i>                                              | (Kelsh <i>et al.</i> , 2009)                                   |
| <i>Gja5</i><br>( <i>cx41.8</i> )   | Gap junction membrane channel protein alpha 5                                                         | ChrVI: 15.6<br>ChrXVI: 8.4                 | ENSGACG00000011699<br>ENSGACG00000003669                       | Melanophore and xanthophore patterning<br>Zebrafish <i>leopard</i> mutant                              | (Watanabe <i>et al.</i> , 2006)                                |
| <i>Hps3</i>                        | Hermansky-Pudlak syndrome 3                                                                           | ChrVIII: 6.0                               | ENSGACG00000006016                                             | Melanosome biogenesis;<br>Mouse <i>Cocoa</i> mutant                                                    | (Navarro <i>et al.</i> , 2008)                                 |
| <i>Kcnj13</i><br>( <i>Kir7.1</i> ) | Potassium inwardly-rectifying channel subfamily J member 13                                           | ChrUn: 26.7                                | ENSGACG00000000413                                             | Melanophore and xanthophore patterning;<br>Zebrafish <i>jaguar/obelix</i> mutant                       | (Iwashita <i>et al.</i> , 2006)                                |
| <i>Kit</i>                         | Kit receptor                                                                                          | ChrVIII: 18.7<br>ChrIX: 0.50               | ENSGACG00000014273<br>ENSGACG00000015944                       | Melanophore development;<br>Zebrafish <i>sparse</i> mutant                                             | (Parichy <i>et al.</i> , 1999)                                 |
| <i>Kitlg</i>                       | Kit ligand                                                                                            | ChrXIX: 10.5<br>ChrIV: 18.0                | ENSGACG00000009373<br>Not Available                            | Melanophore development;<br>Associated with pigmentation differences in sticklebacks                   | (Miller <i>et al.</i> , 2007)                                  |
| <i>Ltk</i>                         | Leukocyte tyrosine kinase                                                                             | ChrXV: 6.0                                 | ENSGACG00000008800                                             | Iridophore development;<br>Zebrafish <i>shady</i> mutant                                               | (Lopes <i>et al.</i> , 2008)                                   |
| <i>Mcl1r</i>                       | Melanocortin 1 receptor                                                                               | ChrII: 12.0                                | ENSGACG00000015952                                             | Melanin synthesis (melanosome dispersal in fish);<br>Associated with overall pigment variation         | (Gross <i>et al.</i> , 2009; Hoekstra, 2006)                   |
| <i>Mchr</i>                        | Melanin concentrating hormone receptor                                                                | ChrIV: 13.5<br>ChrXI: 17.0                 | ENSGACG00000018390<br>ENSGACG00000019387                       | Pigment dispersal                                                                                      | (Kawauchi and Baker, 2004)                                     |
| <i>Mib</i>                         | Mind bomb                                                                                             | ChrIII: 13.6<br>ChrXII: 5.6                | ENSGACG00000017309<br>ENSGACG00000005209                       | Chromatophore development;<br>Zebrafish <i>white tail</i> mutant                                       | (Kelsh <i>et al.</i> , 1996; Svetic <i>et al.</i> , 2007)      |
| <i>Mitf</i>                        | Microphthalmia transcription factor                                                                   | ChrXII: 2.1<br>ChrXVII: 14                 | ENSGACG00000003425<br>ENSGACG00000011875                       | Melanophore and iridophore development;<br>Zebrafish <i>nacre</i> mutant                               | (Lister <i>et al.</i> , 1999)                                  |
| <i>Myo5a</i>                       | Myosin Va                                                                                             | ChrII: 15.6                                | ENSGACG00000016512                                             | Melanosome movement                                                                                    | (Aspengren <i>et al.</i> , 2009)                               |
| <i>Oca2</i>                        | Ocular and cutaneous albinism 2                                                                       | ChrUn: 60.4                                | ENSGACG00000001245                                             | Melanin synthesis;<br>Associated with albinism in cavefish;<br>Medaka <i>pink-eyed dilution</i> mutant | (Fukamachi <i>et al.</i> , 2004a; Protas <i>et al.</i> , 2006) |
| <i>Mycbp2</i><br>( <i>Pam</i> )    | MYC binding protein 2                                                                                 | ChrXVI: 2.4                                | ENSGACG00000001746                                             | Pteridine synthesis;<br>Zebrafish <i>esrom/tofu</i> mutant                                             | (Le Guyader <i>et al.</i> , 2005)                              |
| <i>Pax3</i>                        | Paired homeobox 3                                                                                     | ChrIII: 2.7                                | ENSGACG00000014017                                             | Xanthophore and melanophore development;                                                               | (Minchin and Hughes, 2008)                                     |
| <i>Pax7</i>                        | Paired homeobox 7                                                                                     | LG12: 17.01<br>ChrUn: 5.05                 | ENSGACG00000012890<br>ENSGACG00000001703                       | Xanthophore development;<br>Associated with color variation in cichlids                                | (Minchin and Hughes, 2008; Roberts <i>et al.</i> , 2009)       |
| <i>Pcbd1</i>                       | Pterin-4 alpha-carbinolamine dehydratase/dimerization cofactor of hepatocyte nuclear factor 1 alpha   | ChrVI: 2.9                                 | ENSGACG00000003259                                             | Pteridine synthesis                                                                                    | (Braasch <i>et al.</i> , 2007)                                 |
| <i>Pcbd2</i>                       | Pterin-4 alpha-carbinolamine dehydratase/dimerization cofactor of hepatocyte nuclear factor 1 alpha 2 | ChrUn: 47.1                                | ENSGACG00000000164                                             | Pteridine synthesis                                                                                    | (Braasch <i>et al.</i> , 2007)                                 |
| <i>Pmch</i>                        | Pro-melanin concentrating hormone                                                                     | ChrXIV: 10.7                               | ENSGACG00000018017                                             | Pigment dispersal                                                                                      | (Kawauchi and Baker, 2004)                                     |
| <i>Pomc</i>                        | Pro-opiomelanocortin                                                                                  | ChrX: 14.7<br>ChrXVIII: 10                 | ENSGACG00000009521<br>ENSGACG00000010098                       | Precursor protein for melanocyte stimulating hormone (MSH) peptides                                    | (Logan <i>et al.</i> , 2003)                                   |

|                                   |                                         |                              |                                          |                                                                                 |                                                                      |
|-----------------------------------|-----------------------------------------|------------------------------|------------------------------------------|---------------------------------------------------------------------------------|----------------------------------------------------------------------|
| <i>Prdm1</i>                      | PR domain containing 1, with ZNF domain | ChrXVIII: 9<br>ChrUn: 27.8   | ENSGACG00000009358<br>ENSGACG00000001740 | Chromatophore pigmentation;<br>Zebrafish <i>u-boot/narrowminded</i>             | (Hernandez-Lagunas <i>et al.</i> , 2005; Kelsh <i>et al.</i> , 1996) |
| <i>Prl</i>                        | Prolactin precursor                     | ChrXI: 3.1                   | ENSGACG00000006561                       | Pigment dispersal                                                               | (Oshima and Goto, 2000)                                              |
| <i>Prlr</i>                       | Prolactin receptor                      | ChrXIII: 17.3<br>ChrXIV: 4.0 | ENSGACG00000013765<br>ENSGACG00000016473 | Receptor for prolactin hormone                                                  | (Oshima and Goto, 2000)                                              |
| <i>Pts</i>                        | 6-pyruvoyltetrahydropterin synthase     | ChrV: 12.1                   | ENSGACG00000010227                       | Pteridine synthesis                                                             | (Braasch <i>et al.</i> , 2007)                                       |
| <i>Silv</i><br>( <i>Pmel17</i> )  | Silver protein                          | ChrXII: 15.3<br>ChrUn: 1.13  | ENSGACG00000011605<br>ENSGACG00000000544 | Melanosome biogenesis;<br>Zebrafish <i>fading vision</i> mutant                 | Schonthaler <i>et al.</i> 2005                                       |
| <i>Slc24a5</i>                    | Solute carrier family 24, member 5      | ChrII: 18.3                  | ENSGACG00000016752                       | Melanosome biogenesis;<br>Zebrafish <i>golden</i> mutant                        | (Lamason <i>et al.</i> , 2005)                                       |
| <i>Slc45a2</i><br>( <i>Aim1</i> ) | Solute carrier family 45, member 2      | ChrXIV: 3.5                  | ENSGACG00000016297                       | Melanosome biogenesis;<br>Medaka <i>b</i> mutation                              | (Braasch <i>et al.</i> , 2007;<br>Fukamachi <i>et al.</i> , 2001)    |
| <i>Sl</i>                         | Somatolactin                            | ChrI: 3.5                    | ENSGACG00000006593                       | Leucophore and xanthophore development;<br>Medaka <i>color interfere</i> mutant | (Fukamachi <i>et al.</i> , 2004b)                                    |
| <i>Sox10</i>                      | Sry box containing gene 10              | ChrIX: 0.8<br>ChrXI: 4.2     | ENSGACG00000016017<br>ENSGACG00000007318 | Chromatophore differentiation;<br>Zebrafish <i>colourless</i> mutant            | (Dutton <i>et al.</i> , 2001)                                        |
| <i>Spr</i>                        | Sepiapterin reductase                   | ChrXIII: 5.1<br>ChrXIV: 14.5 | ENSGACG00000006643<br>ENSGACG00000018502 | Pteridine synthesis                                                             | (Braasch <i>et al.</i> , 2007)                                       |
| <i>Trim33</i>                     | Tripartite motif-containing 33          | ChrXII: 5.5                  | ENSGACG00000004973                       | Iridophore development;<br>Zebrafish <i>moonshine</i> mutant                    | (Kelsh <i>et al.</i> , 1996; Ransom <i>et al.</i> , 2004)            |
| <i>Txndc17</i><br>( <i>Clot</i> ) | Thioredoxin domain containing 17        | ChrI: 12.1                   | ENSGACG00000010961                       | Pteridine synthesis                                                             | (Braasch <i>et al.</i> , 2007)                                       |
| <i>Tyr</i>                        | Tyrosinase                              | ChrI: 6.3<br>ChrVII: 20.7    | ENSGACG00000007960<br>ENSGACG00000020587 | Melanin synthesis;<br>Zebrafish <i>sandy</i> mutant<br>Medaka <i>i</i> mutant   | (Koga <i>et al.</i> , 1995; Page-McCaw <i>et al.</i> , 2004)         |
| <i>Tyrp1</i>                      | Tyrosinase-related protein 1            | ChrVII: 5.6<br>ChrIX: 0.3    | ENSGACG00000019503<br>ENSGACG00000015912 | Melanin synthesis;                                                              | (Braasch <i>et al.</i> , 2007)                                       |
| <i>Vps33a</i>                     | Vacuolar protein sorting 33A            | ChrXIII: 12.9                | ENSGACG00000011308                       | Melanosome biogenesis                                                           | (Navarro <i>et al.</i> , 2008)                                       |
| <i>Vps33b</i>                     | Vacuolar protein sorting 33B            | ChrII: 22.0                  | ENSGACG00000017403                       | Melanosome biogenesis                                                           | (Navarro <i>et al.</i> , 2008)                                       |
| <i>Xdh</i>                        | Xanthine dehydrogenase                  | ChrI: 27.5                   | ENSGACG00000015453                       | Pteridine synthesis                                                             | (Braasch <i>et al.</i> , 2007)                                       |

## Supplementary References

Aspengren S, Hedberg D, Skold HN, Wallin M (2009). New insights into melanosome transport in vertebrate pigment cells. *Int Rev Cell Mol Biol* **272**: 245-302.

Braasch I, Schartl M, Volff JN (2007). Evolution of pigment synthesis pathways by gene and genome duplication in fish. *BMC Evol Biol* **7**: 74.

Budi EH, Patterson LB, Parichy DM (2008). Embryonic requirements for ErbB signaling in neural crest development and adult pigment pattern formation. *Development* **135**: 2603-2614.

Cerda-Reverter JM, Haitina T, Schioth HB, Peter RE (2005). Gene structure of the goldfish agouti-signaling protein: a putative role in the dorsal-ventral pigment pattern of fish. *Endocrinology* **146**: 1597-1610.

Curran K, Raible DW, Lister JA (2009). *Foxd3* controls melanophore specification in the zebrafish neural crest by regulation of *Mitf*. *Dev Biol* **332**: 408-417.

Dutton KA, Pauliny A, Lopes SS, Elworthy S, Carney TJ, Rauch J *et al* (2001). Zebrafish *colourless* encodes *sox10* and specifies non-ectomesenchymal neural crest fates. *Development* **128**: 4113-4125.

Fukamachi S, Asakawa S, Wakamatsu Y, Shimizu N, Mitani H, Shima A (2004a). Conserved function of medaka *pink-eyed dilution* in melanin synthesis and its divergent transcriptional regulation in gonads among vertebrates. *Genetics* **168**: 1519-1527.

Fukamachi S, Shimada A, Shima A (2001). Mutations in the gene encoding *B*, a novel transporter protein, reduce melanin content in medaka. *Nat Genet* **28**: 381-385.

Fukamachi S, Sugimoto M, Mitani H, Shima A (2004b). Somatolactin selectively regulates proliferation and morphogenesis of neural-crest derived pigment cells in medaka. *Proc Natl Acad Sci U S A* **101**: 10661-10666.

Gross JB, Borowsky R, Tabin CJ (2009). A novel role for *Mc1r* in the parallel evolution of depigmentation in independent populations of the cavefish *Astyanax mexicanus*. *PLoS Genet* **5**: e1000326.

Hernandez-Lagunas L, Choi IF, Kaji T, Simpson P, Hershey C, Zhou Y *et al* (2005). Zebrafish *narrowminded* disrupts the transcription factor *prdm1* and is required for neural crest and sensory neuron specification. *Dev Biol* **278**: 347-357.

Hoekstra HE (2006). Genetics, development and evolution of adaptive pigmentation in vertebrates. *Heredity* **97**: 222-234.

Iwashita M, Watanabe M, Ishii M, Chen T, Johnson SL, Kurachi Y *et al* (2006). Pigment pattern in *jaguar/obelix* zebrafish is caused by a Kir7.1 mutation: implications for the regulation of melanosome movement. *PLoS Genet* **2**: e197.

Kawakami K, Amsterdam A, Shimoda N, Becker T, Mugg J, Shima A *et al* (2000). Proviral insertions in the zebrafish *hagoromo* gene, encoding an F-box/WD40-repeat protein, cause stripe pattern anomalies. *Curr Biol* **10**: 463-466.

Kawauchi H, Baker BI (2004). Melanin-concentrating hormone signaling systems in fish. *Peptides* **25**: 1577-1584.

Kelsh RN, Brand M, Jiang YJ, Heisenberg CP, Lin S, Haffter P *et al* (1996). Zebrafish pigmentation mutations and the processes of neural crest development. *Development* **123**: 369-389.

Kelsh RN, Harris ML, Colanesi S, Erickson CA (2009). Stripes and belly-spots -- a review of pigment cell morphogenesis in vertebrates. *Semin Cell Dev Biol* **20**: 90-104.

Koga A, Inagaki H, Bessho Y, Hori H (1995). Insertion of a novel transposable element in the tyrosinase gene is responsible for an albino mutation in the medaka fish, *Oryzias latipes*. *Mol Gen Genet* **249**: 400-405.

Lamason RL, Mohideen MA, Mest JR, Wong AC, Norton HL, Aros MC *et al* (2005). SLC24A5, a putative cation exchanger, affects pigmentation in zebrafish and humans. *Science* **310**: 1782-1786.

Lang MR, Patterson LB, Gordon TN, Johnson SL, Parichy DM (2009). Basonuclin-2 requirements for zebrafish adult pigment pattern development and female fertility. *PLoS Genet* **5**: e1000744.

Le Guyader S, Maier J, Jesuthasan S (2005). Esrom, an ortholog of PAM (protein associated with c-myc), regulates pteridine synthesis in the zebrafish. *Dev Biol* **277**: 378-386.

Lister JA, Robertson CP, Lepage T, Johnson SL, Raible DW (1999). *nacre* encodes a zebrafish microphthalmia-related protein that regulates neural-crest-derived pigment cell fate. *Development* **126**: 3757-3767.

Logan DW, Bryson-Richardson RJ, Pagan KE, Taylor MS, Currie PD, Jackson IJ (2003). The structure and evolution of the melanocortin and MCH receptors in fish and mammals. *Genomics* **81**: 184-191.

Lopes SS, Yang X, Muller J, Carney TJ, McAdow AR, Rauch GJ *et al* (2008). Leukocyte tyrosine kinase functions in pigment cell development. *PLoS Genet* **4**: e1000026.



- Miller CT, Beleza S, Pollen AA, Schluter D, Kittles RA, Shriver MD *et al* (2007). cis-Regulatory changes in *Kit ligand* expression and parallel evolution of pigmentation in sticklebacks and humans. *Cell* **131**: 1179-1189.
- Minchin JE, Hughes SM (2008). Sequential actions of *Pax3* and *Pax7* drive xanthophore development in zebrafish neural crest. *Dev Biol* **317**: 508-522.
- Montero-Balaguer M, Lang MR, Sachdev SW, Knappmeyer C, Stewart RA, De La Guardia A *et al* (2006). The *mother superior* mutation ablates *foxd3* activity in neural crest progenitor cells and depletes neural crest derivatives in zebrafish. *Dev Dyn* **235**: 3199-3212.
- Navarro RE, Ramos-Balderas JL, Guerrero I, Pelcastre V, Maldonado E (2008). Pigment dilution mutants from fish models with connection to lysosome-related organelles and vesicular traffic genes. *Zebrafish* **5**: 309-318.
- Oshima N, Goto M (2000). Prolactin signaling in erythrophores and xanthophores of teleost fish. *Pigment Cell Res* **13 Suppl 8**: 35-40.
- Page-McCaw PS, Chung SC, Muto A, Roeser T, Staub W, Finger-Baier KC *et al* (2004). Retinal network adaptation to bright light requires tyrosinase. *Nat Neurosci* **7**: 1329-1336.
- Parichy DM, Mellgren EM, Rawls JF, Lopes SS, Kelsh RN, Johnson SL (2000a). Mutational analysis of endothelin receptor b1 (*rose*) during neural crest and pigment pattern development in the zebrafish *Danio rerio*. *Dev Biol* **227**: 294-306.
- Parichy DM, Ransom DG, Paw B, Zon LI, Johnson SL (2000b). An orthologue of the kit-related gene *fms* is required for development of neural crest-derived xanthophores and a subpopulation of adult melanocytes in the zebrafish, *Danio rerio*. *Development* **127**: 3031-3044.
- Parichy DM, Rawls JF, Pratt SJ, Whitfield TT, Johnson SL (1999). Zebrafish *sparse* corresponds to an orthologue of *c-kit* and is required for the morphogenesis of a subpopulation of melanocytes, but is not essential for hematopoiesis or primordial germ cell development. *Development* **126**: 3425-3436.
- Protas ME, Hersey C, Kochanek D, Zhou Y, Wilkens H, Jeffery WR *et al* (2006). Genetic analysis of cavefish reveals molecular convergence in the evolution of albinism. *Nat Genet* **38**: 107-111.
- Ransom DG, Bahary N, Niss K, Traver D, Burns C, Trede NS *et al* (2004). The zebrafish *moonshine* gene encodes transcriptional intermediary factor 1gamma, an essential regulator of hematopoiesis. *PLoS Biol* **2**: E237.
- Roberts RB, Ser JR, Kocher TD (2009). Sexual conflict resolved by invasion of a novel sex determiner in Lake Malawi cichlid fishes. *Science* **326**: 998-1001.

Starcevic M, Dell'Angelica EC (2004). Identification of snapin and three novel proteins (BLOS1, BLOS2, and BLOS3/reduced pigmentation) as subunits of biogenesis of lysosome-related organelles complex-1 (BLOC-1). *J Biol Chem* **279**: 28393-28401.

Svetic V, Hollway GE, Elworthy S, Chipperfield TR, Davison C, Adams RJ *et al* (2007). *Sdf1a* patterns zebrafish melanophores and links the somite and melanophore pattern defects in *choker* mutants. *Development* **134**: 1011-1022.

Watanabe M, Iwashita M, Ishii M, Kurachi Y, Kawakami A, Kondo S *et al* (2006). Spot pattern of *leopard* Danio is caused by mutation in the zebrafish connexin41.8 gene. *EMBO Rep* **7**: 893-897.
